# Supplementary material for: Association between activating KIR and Perianal Crohn’s Disease in Pediatric Patients: A Nested case–control study
Source: Research Square preprint supplement (doi:10.21203/rs.3.rs-7953845/v1), 2025-11-24
Supplement: Supplementary file 1 [file a8854ac3cdb205604c4a561c.docx]

Supp.Table 1 Subgroup Analysis Results.

| Subgroup | Variable | n | event(%) | 95%CI | *P.value* | P.for.interaction |
| --- | --- | --- | --- | --- | --- | --- |
| Age at diagnosis | Activating KIR2DS5 status |  |  |  |  |  |
|  |  |  |  |  |  | 0.857 |
| <12y | Absent | 34 | 7 (20.6) | 1(Ref) |  |  |
|  | Present | 39 | 9 (23.1) | 3.38 (0.76~15.01) | 0.109 |  |
| 12~15y | Absent | 27 | 4 (14.8) | 1(Ref) |  |  |
|  | Present | 46 | 10 (21.7) | 4.67 (0.69~31.51) | 0.114 |  |
| >15y | Absent | 15 | 2 (13.3) | 1(Ref) |  |  |
|  | Present | 26 | 9 (34.6) | 5.49 (0.61~49.44) | 0.129 |  |
| Gender |  |  |  |  |  | 0.408 |
| Female | Absent | 33 | 2 (6.1) | 1(Ref) |  |  |
|  | Present | 58 | 10 (17.2) | 6.06 (0.83~44.01) | 0.075 |  |
| Male | Absent | 43 | 11 (25.6) | 1(Ref) |  |  |
|  | Present | 53 | 18 (34) | 2.68 (0.91~7.88) | 0.073 |  |
| Center/race |  |  |  |  |  | 0.07 |
| Montreal | Absent | 26 | 1 (3.8) | 1(Ref) |  |  |
|  | Present | 69 | 14 (20.3) | 14.89 (1.29~172.19) | 0.031 |  |
| Ottawa | Absent | 50 | 12 (24) | 1(Ref) |  |  |
|  | Present | 42 | 14 (33.3) | 1.6 (0.52~4.95) | 0.417 |  |
| KIR genes |  |  |  |  |  |  |
| KIR2DS1 |  |  |  |  |  | 0.638 |
| Absent | Absent | 18 | 3 (16.7) | 1(Ref) |  |  |
|  | Present | 28 | 8 (28.6) | 57.82 (0.86~3889.6) | 0.059 |  |
| Present | Absent | 58 | 10 (17.2) | 1(Ref) |  |  |
|  | Present | 83 | 20 (24.1) | 2.32 (0.87~6.17) | 0.092 |  |
| KIR2DS2 |  |  |  |  |  | 0.31 |
| Absent | Absent | 18 | 2 (11.1) | 1(Ref) |  |  |
|  | Present | 31 | 9 (29) | 8.61 (0.9~82.09) | 0.061 |  |
| Present | Absent | 58 | 11 (19) | 1(Ref) |  |  |
|  | Present | 80 | 19 (23.8) | 2.26 (0.81~6.27) | 0.117 |  |
| KIR3DS3 |  |  |  |  |  | 0.763 |
| Absent | Absent | 36 | 7 (19.4) | 1(Ref) |  |  |
|  | Present | 52 | 13 (25) | 3.13 (0.61~16) | 0.171 |  |
| Present | Absent | 40 | 6 (15) | 1(Ref) |  |  |
|  | Present | 59 | 15 (25.4) | 2.44 (0.73~8.1) | 0.146 |  |
| KIR2DS4a |  |  |  |  |  | 0.718 |
| Absent | Absent | 21 | 2 (9.5) | 1(Ref) |  |  |
|  | Present | 28 | 6 (21.4) | 4.95 (0.24~102.79) | 0.302 |  |
| Present | Absent | 55 | 11 (20) | 1(Ref) |  |  |
|  | Present | 83 | 22 (26.5) | 2.71 (1.02~7.22) | 0.046 |  |
| KIR2DS4b |  |  |  |  |  | 0.718 |
| Absent | Absent | 21 | 2 (9.5) | 1(Ref) |  |  |
|  | Present | 28 | 6 (21.4) | 4.95 (0.24~102.79) | 0.302 |  |
| Present | Absent | 55 | 11 (20) | 1(Ref) |  |  |
|  | Present | 83 | 22 (26.5) | 2.71 (1.02~7.22) | 0.046 |  |
| KIR3DS1 |  |  |  |  |  | 0.145 |
| Absent | Absent | 36 | 5 (13.9) | 1(Ref) |  |  |
|  | Present | 37 | 12 (32.4) | 6.93 (1.36~35.34) | 0.02 |  |
| Present | Absent | 40 | 8 (20) | 1(Ref) |  |  |
|  | Present | 74 | 16 (21.6) | 1.93 (0.59~6.3) | 0.278 |  |

Adjust covariant:Gender, age at diagnosis, center/race, disease location, and other KIR genes (KIR2DS1, KIR2DS2, KIR2DS3, KIR2DS4a, KIR2DS4b, KIR3DS1).The P.for.interaction values indicate the statistical significance of the interaction between KIR2DS5 mutation status and each subgroup.
